# Supplementary material
Source: PubMed Central journal article supplement (PMC3951478)
Supplement: NIHMS467159-supplement-Supporting_Info_.pdf [file NIHMS467159-supplement-Supporting_Info_.pdf]

1 **Supplemental Figures**

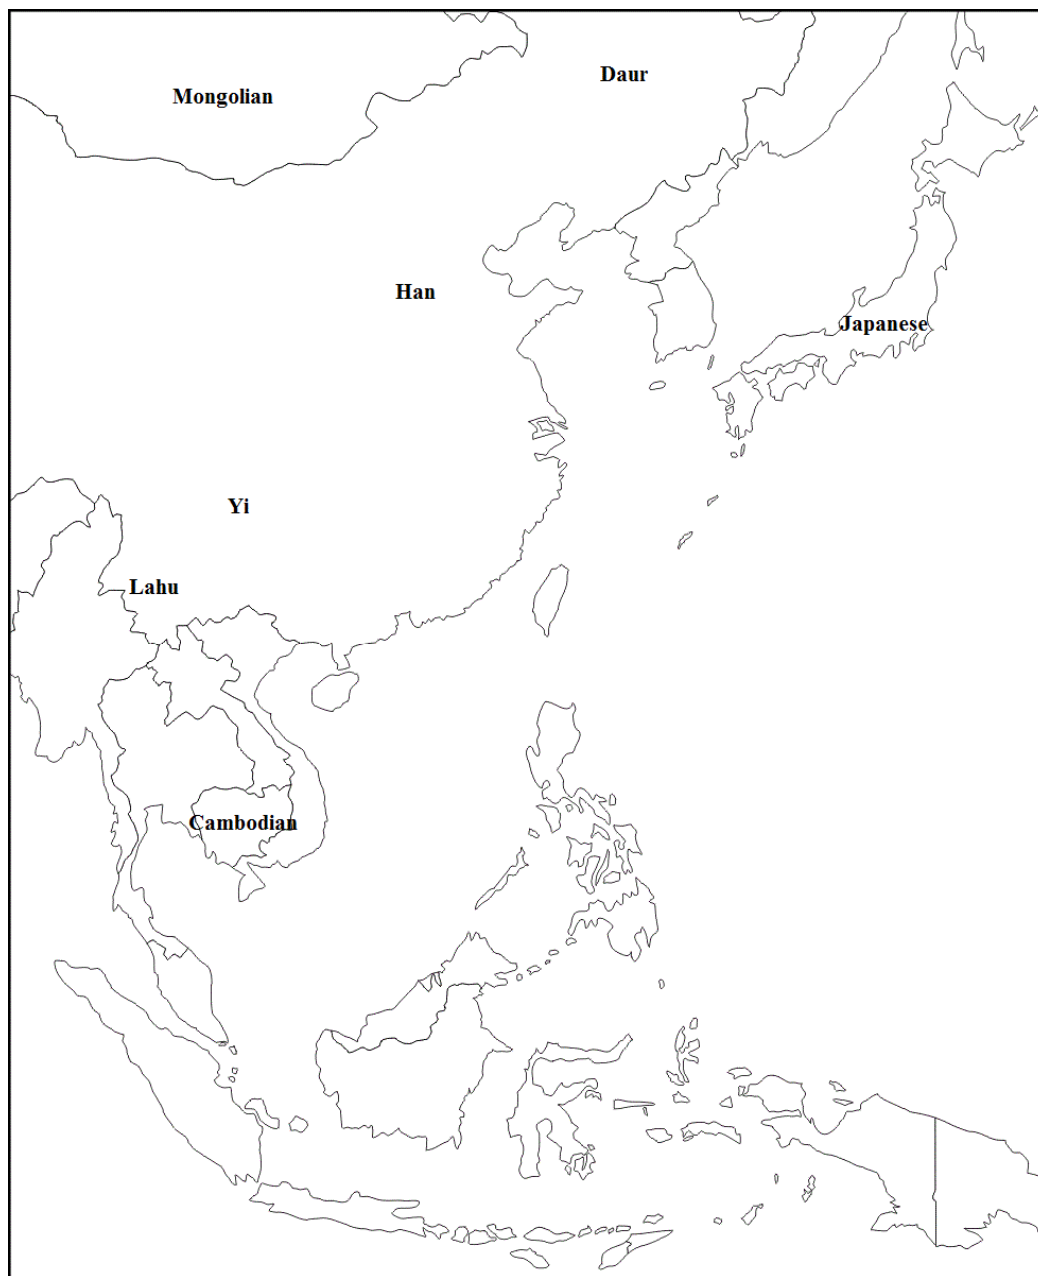

2

3 Sup. Fig. 1 Geographic locations of the seven East Asian Populations

4 A

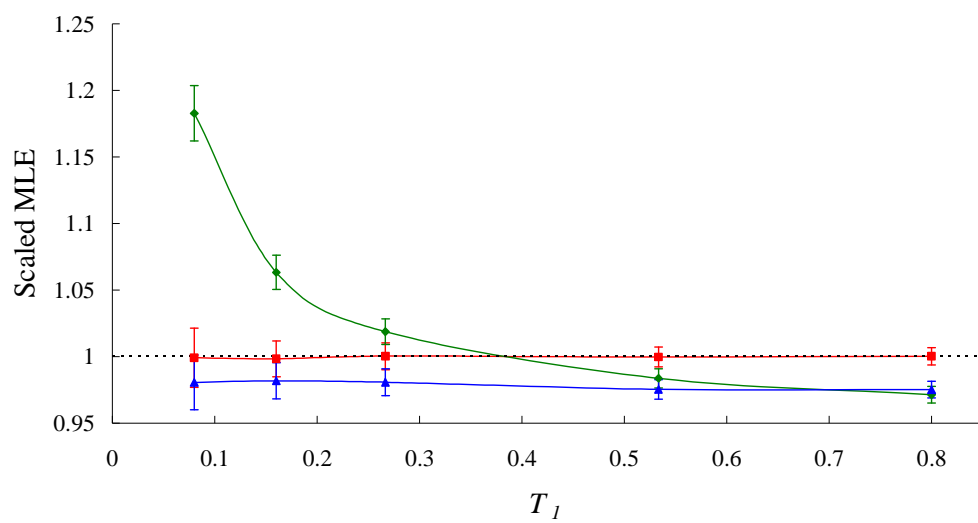

5

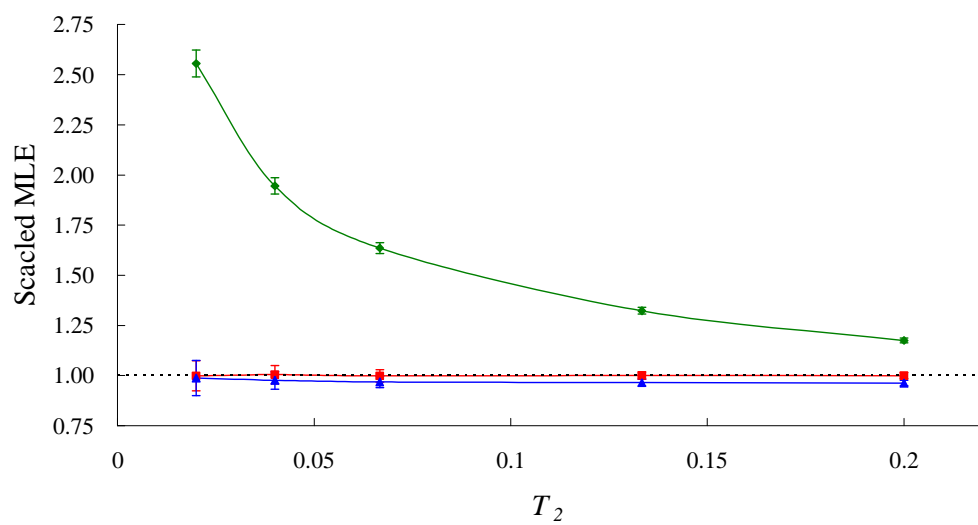

6

7 B

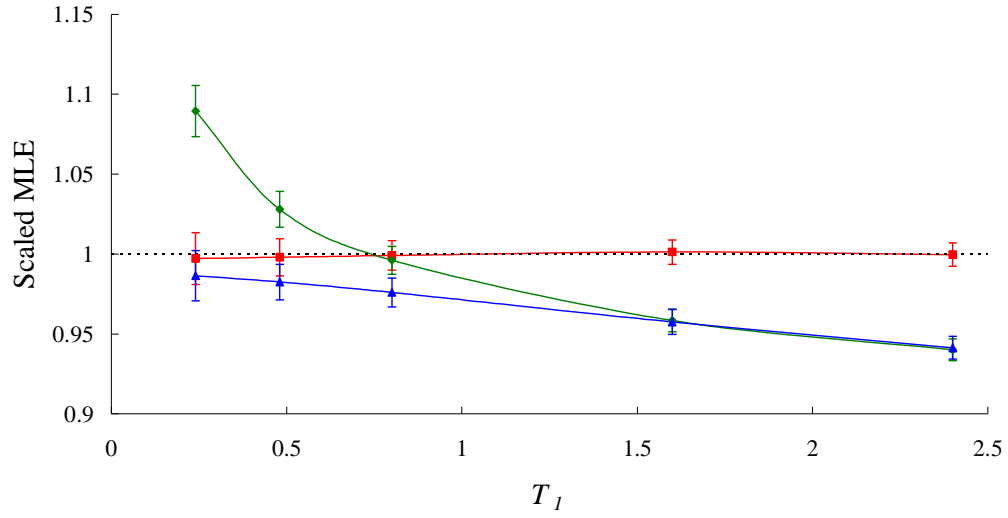

8

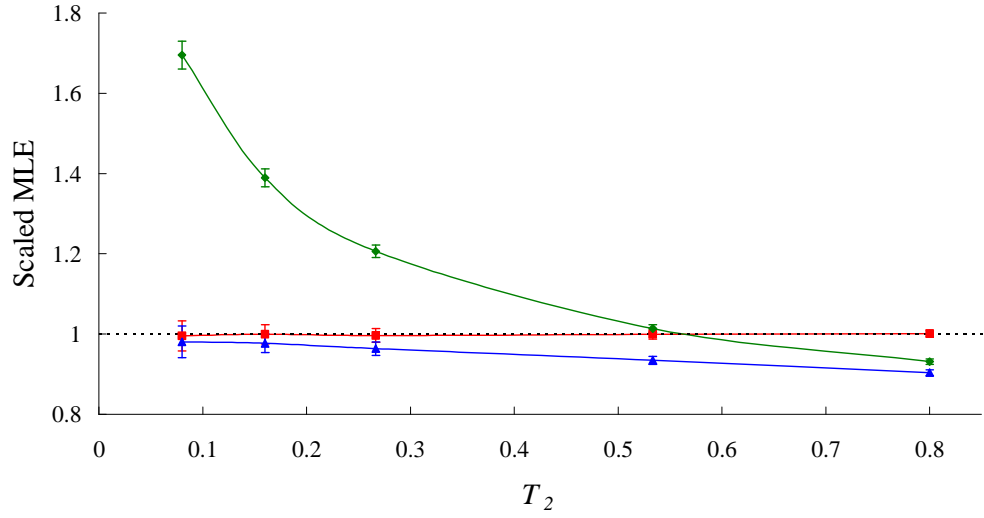

9

10 Sup. Fig. 2 Scaled maximum likelihood estimate of the divergence time plotted  
 11 against the true value for different effective population sizes

12 A

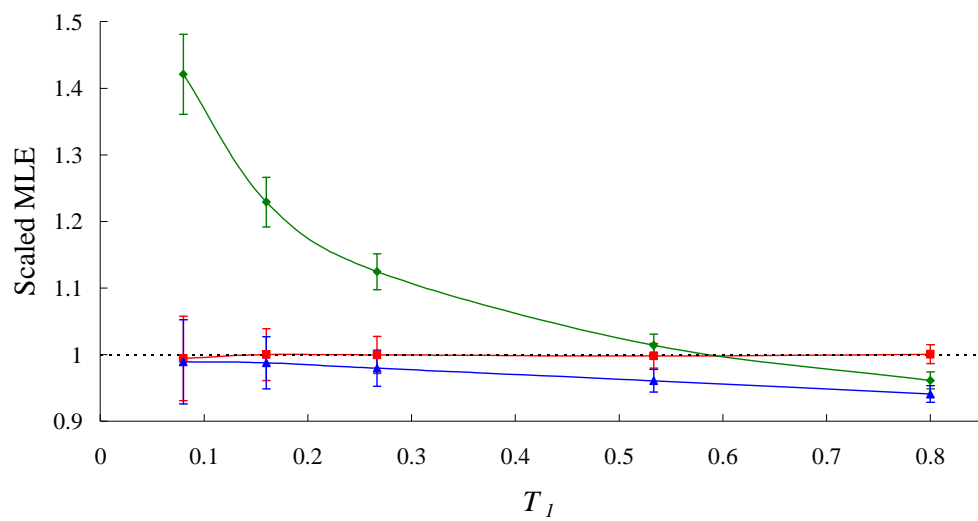

13

14 B

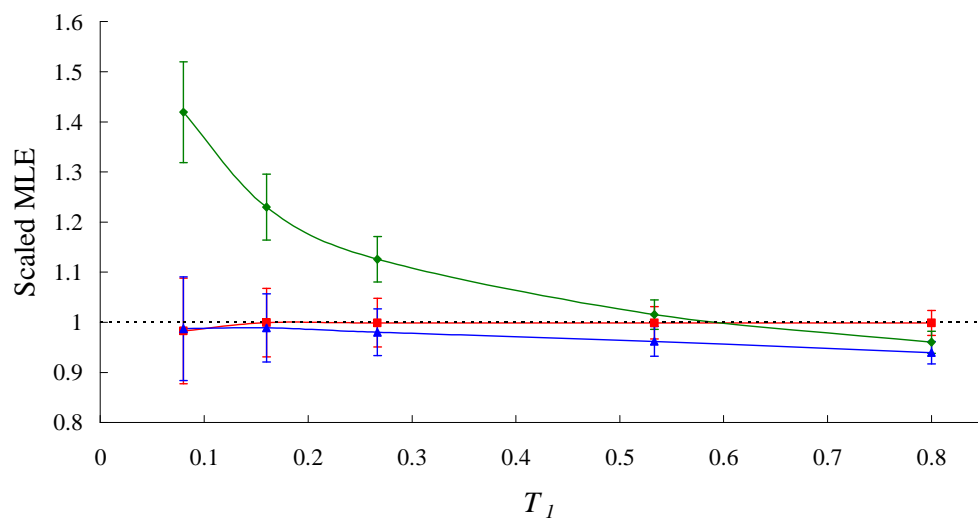

15

16 C

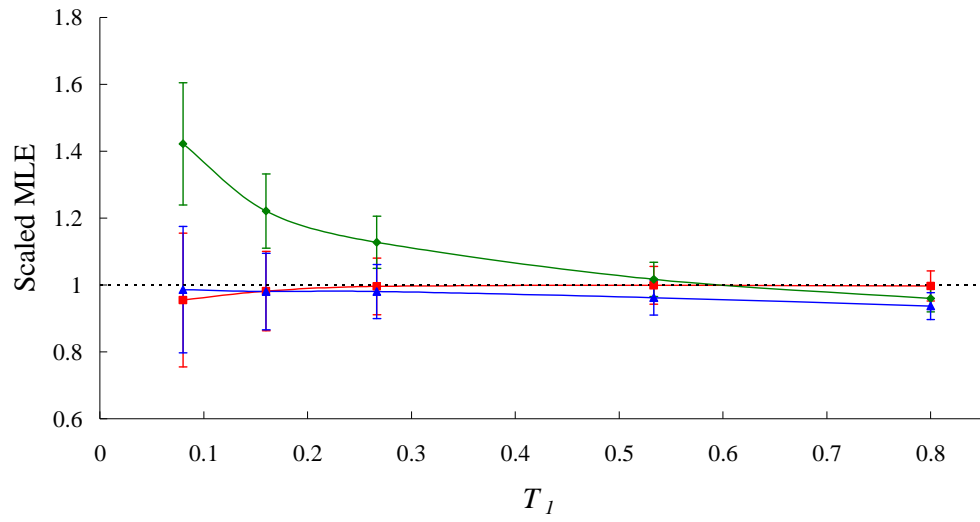

17

18 D

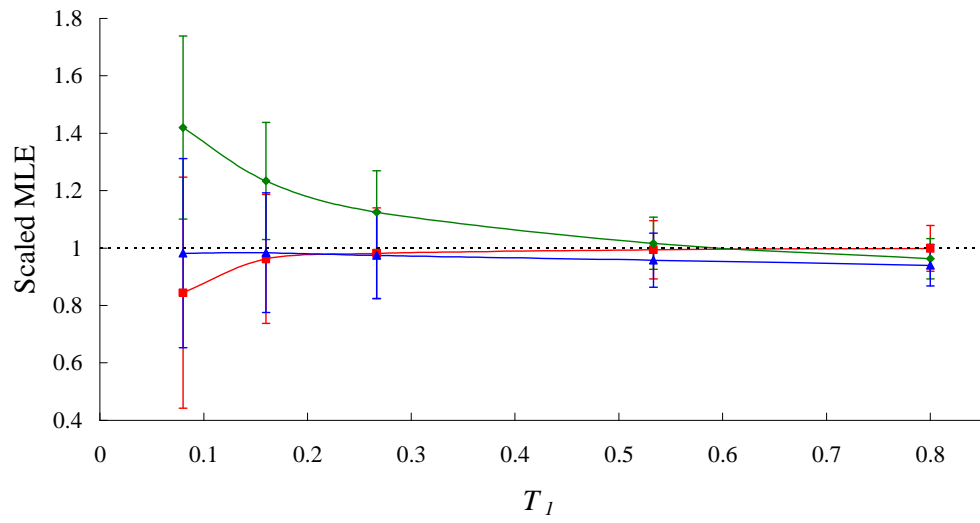

19

20 Fig. 3 Scaled maximum likelihood estimate of divergence time plotted against the true

21 value for different number of SNPs

22 A

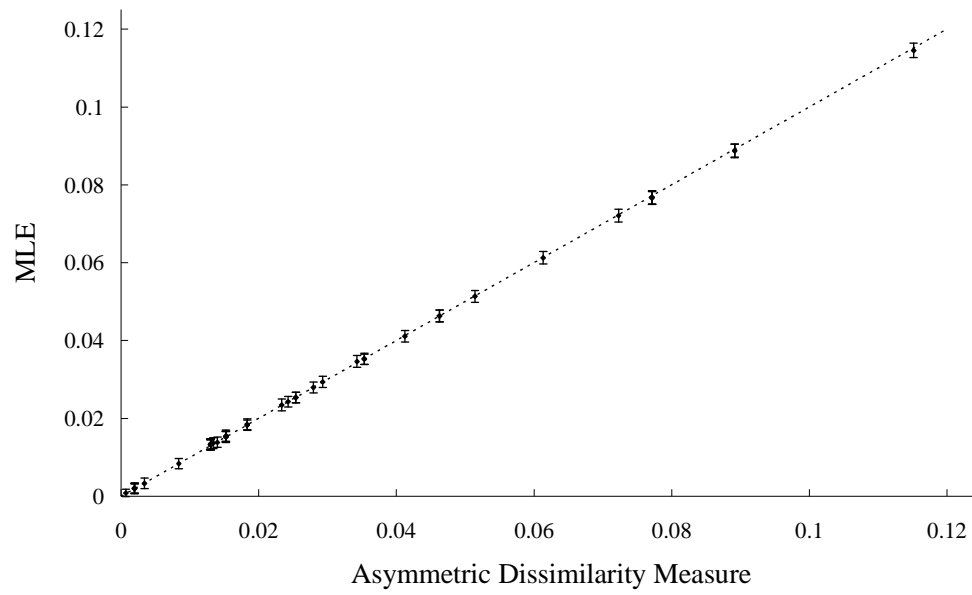

23

24 B

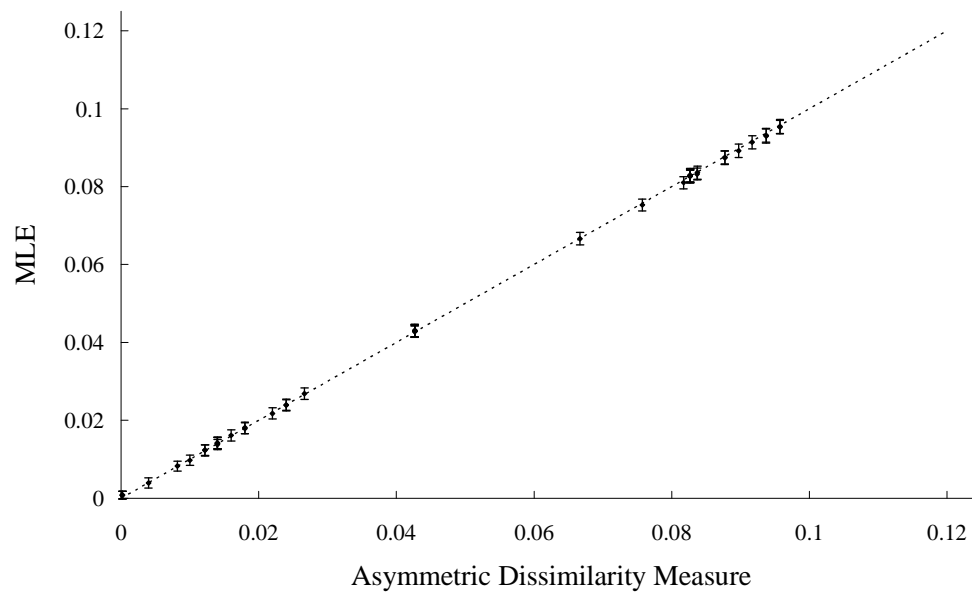

25

26 Sup. Fig. 4 Maximum likelihood estimate of asymmetric dissimilarity measure plotted

27 against the expected value

## 28    **Supplemental Figure Legends**

29    Sup. Fig. 1 Geographic locations of the seven East Asian Populations

30

31    Sup. Fig. 2 Data were simulated from population structure shown in Fig. 1B with  
32    population size A)  $N_1=937.5$  and  $N_2=3750$  and B)  $N_1=937.5$  and  $N_2=312.5$ , and  
33    different divergence times ranging from 3,000 years to 30,000 years. For each  
34    combination of population sizes and divergence time, 1,000 data sets were simulated.  
35    Average value of 1,000 maximum likelihood estimates was scaled by and plotted  
36    against the true value of divergence time, with bars representing scaled standard  
37    deviations. Red line represents the result from fully-parameterized method. Green line  
38    represents the result from IS-based method. Blue line represents the result from  
39    Beta-based method.

40

41    Sup. Fig. 3 Data were simulated from population structure shown in Fig. 1B with  
42    population size  $N_1=N_2=937.5$ , and different divergence times ranging from 3,000  
43    years to 30,000 years. For each combination of population sizes and divergence time,  
44    1,000 data sets were simulated, each including A) 30,000, B) 10,000, C) 3,000 and D)  
45    1,000 SNPs, respectively. Average value of 1,000 maximum likelihood estimates was  
46    scaled by and plotted against the true value of divergence time, with bars representing  
47    scaled standard deviations. Red line represents the result from fully-parameterized  
48    method. Green line represents the result from IS-based method. blue line represents  
49    the result from Beta-based method.

50

51 Sup. Fig. 4 Data were simulated using population tree shown in A) Fig. 4A. and B)  
52 Fig. 4B. For each population tree, 1,000 data sets were simulated. Asymmetric  
53 dissimilarity measures were estimated from each data set. The average of 1,000  
54 maximum likelihood estimates was plotted against the expected value of the  
55 corresponding asymmetric dissimilarity measure, with bars representing standard  
56 deviations.
